# Supplementary material for: Distinct Changes in Calpain and Calpastatin during PNS Myelination and Demyelination in Rodent Models
Source: MDPI journal article supplement (doi:10.3390/ijms232315443), 2022-12-06
Supplement: s1 [file s1]

Supplementary Materials

| Average Number of Nodes | Shapiro-Wilk Test |         | Student's t-test |                     |         |
|-------------------------|-------------------|---------|------------------|---------------------|---------|
|                         | W                 | P-value | F test P-value   | t, df               | P-value |
| Wild-type               | 0.8521            | 0.1635  | 0.2183           | t = 11.83<br>df = 9 | <0.0001 |
| Trembler-J              | 0.9583            | 0.7963  | -                | -                   | -       |

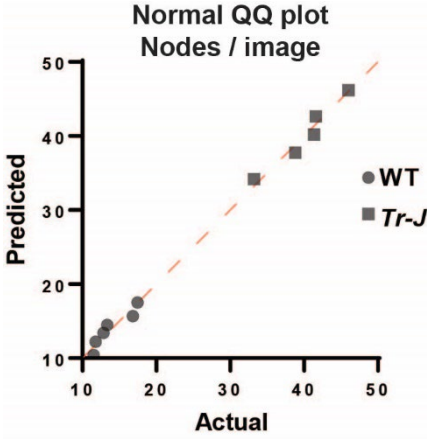

Supplementary S1. Statistical information for Figure 2.

| Shapiro-Wilk Test      |        |         |                | Student's t-test        |                          |
|------------------------|--------|---------|----------------|-------------------------|--------------------------|
| CAPN1                  | W      | P-value | F test P-value | t, df                   | P-value                  |
| Wild-type              | 0.8623 | 0.1972  | 0.4774         | t = 2.863<br>df = 9     | 0.0187                   |
| <i>Trembler-J</i>      | 0.9301 | 0.5974  | -              | -                       | -                        |
| CAPN2                  |        |         |                |                         |                          |
| Wild-type              | 0.9627 | 0.84    | 0.3585         | t = 1.981<br>df = 9     | 0.0789                   |
| <i>Trembler-J</i>      | 0.8488 | 0.1908  | -              | -                       | -                        |
| Calpastatin            |        |         |                | Welch's t-test          | Welch's t-test P-value   |
| Wild-type              | 0.9134 | 0.459   | 0.0129         | t = 2.685<br>df = 4.482 | 0.0487                   |
| <i>Trembler-J</i>      | 0.9218 | 0.5416  | -              | -                       | -                        |
| Calpain Activity Assay |        |         |                | Student's t-test        | Student's t-test P-value |
| Wild-type              | 0.9605 | 0.6179  | 0.2739         | t = 5.629<br>df = 4     | 0.0049                   |
| <i>Trembler-J</i>      | 0.979  | 0.7234  | -              | -                       | -                        |

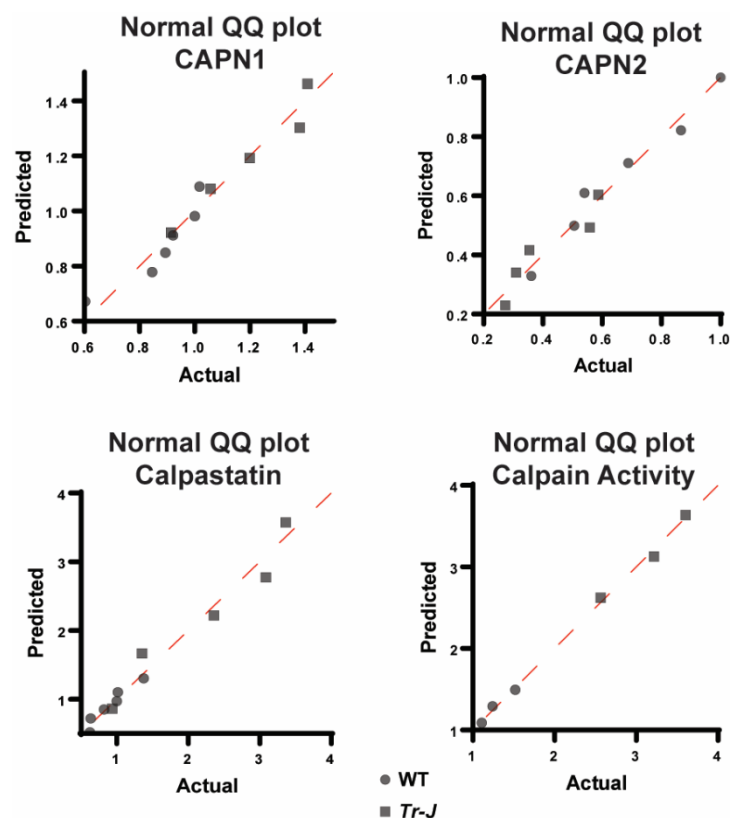

Supplementary S2. Statistical information for Figure 3.

| Shapiro-Wilk Test |        |         |                                                     |            |                  |
|-------------------|--------|---------|-----------------------------------------------------|------------|------------------|
|                   | W      | P-value | One Way ANOVA<br>with Tukey Multiple<br>Comparisons | Mean Diff. | Adjusted P-value |
| Lysolecithin      | 0.9219 | 0.5192  | Lysolecithin vs. Vehicle                            | -2.784     | 0.0023           |
| Vehicle           | 0.9527 | 0.7621  | Lysolecithin vs. Intact                             | -2.593     | 0.0041           |
| Intact            | 0.8855 | 0.2952  | Vehicle vs. Intact                                  | 0.1918     | 0.9561           |

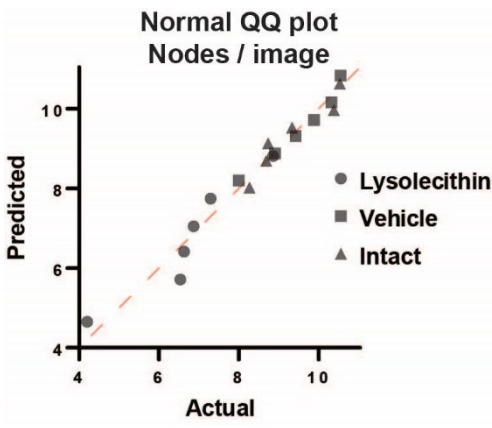

Supplementary S3. Statistical information for Figure 4.

|                 | Shapiro-Wilk Test |         | Student's t-test |                       |         |
|-----------------|-------------------|---------|------------------|-----------------------|---------|
| CAPN1 80kDa     | W                 | P-value | F test P-value   | t, df                 | P-value |
| Vehicle         | 0.8664            | 0.2123  | 0.277            | t = 2.295<br>df=10    | 0.0446  |
| Lysolecithin    | 0.919             | 0.4982  | -                | -                     | -       |
| CAPN1 76/78 kDa |                   |         |                  |                       |         |
| Vehicle         | 0.9392            | 0.6531  | 0.9504           | t = 4.117<br>df = 10  | 0.0021  |
| Lysolecithin    | 0.8175            | 0.084   | -                | -                     | -       |
| CAPN2           |                   |         |                  |                       |         |
| Vehicle         | 0.9289            | 0.5714  | 0.9139           | t = 0.9294<br>df = 10 | 0.3745  |
| Lysolecithin    | 0.9631            | 0.843   | -                | -                     | -       |
| Calpastatin     |                   |         |                  |                       |         |
| Vehicle         | 0.9133            | 0.4588  | 0.4704           | t = 5.445<br>df = 10  | 0.0003  |
| Lysolecithin    | 0.8547            | 0.1716  | -                | -                     | -       |
| NF-M            |                   |         |                  |                       |         |
| Vehicle         | 0.9613            | 0.8297  | 0.224            | t = 0.7975<br>df = 10 | 0.4437  |
| Lysolecithin    | 0.8255            | 0.0985  | -                | -                     | -       |
| DRP2            |                   |         |                  |                       |         |
| Vehicle         | 0.9293            | 0.5751  | 0.8455           | t = 12.03<br>df = 10  | <0.0001 |
| Lysolecithin    | 0.8517            | 0.1625  | -                | -                     | -       |

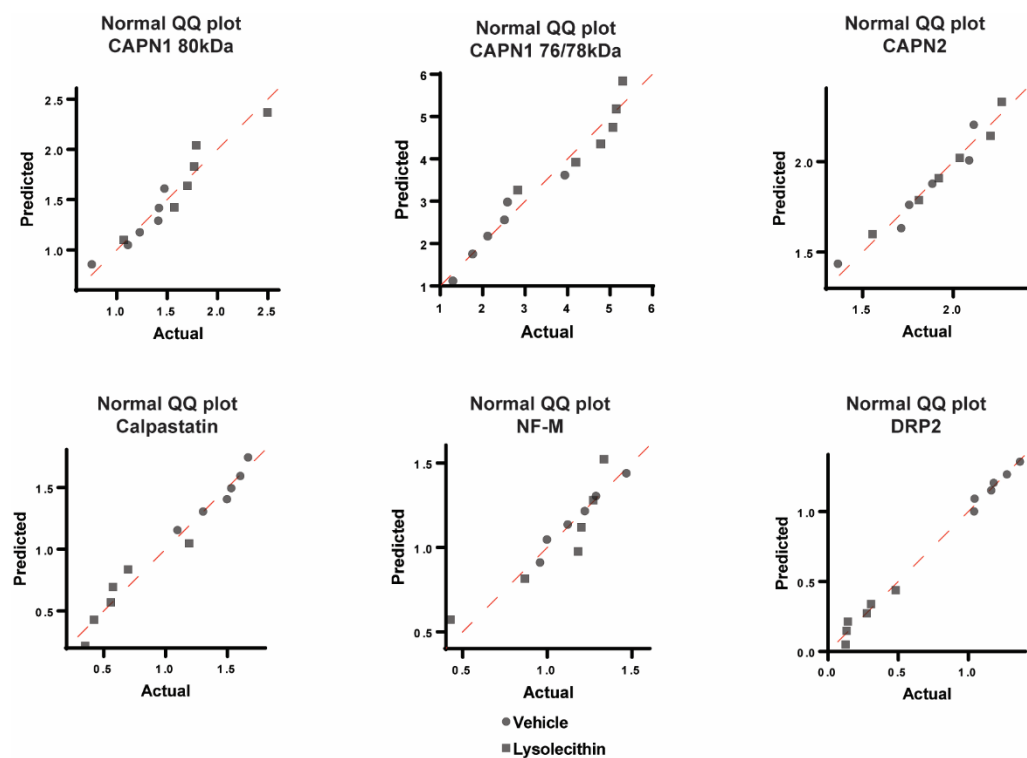

Supplementary S4. Statistical information for Figure 5.

|                        | Shapiro-Wilk Test |         | Student's t-test |                         |                           |
|------------------------|-------------------|---------|------------------|-------------------------|---------------------------|
| CAPN1 80kDa            | W                 | P-value | F test P-value   | t, df                   | P-value                   |
| Intact                 | 0.9554            | 0.7839  | 0.1267           | t = 0.5972<br>df = 10   | 0.5637                    |
| Crush                  | 0.9562            | 0.7902  | -                | -                       | -                         |
| <b>CAPN1 76/78 kDa</b> |                   |         |                  |                         |                           |
| Intact                 | 0.8424            | 0.1366  | 0.4762           | t = 4.753<br>df = 10    | 0.0008                    |
| Crush                  | 0.9163            | 0.479   | -                | -                       | -                         |
| <b>CAPN2</b>           |                   |         |                  |                         |                           |
| Intact                 | 0.8214            | 0.0907  | 0.622            | t = 3.316<br>df = 10    | 0.0078                    |
| Crush                  | 0.8307            | 0.1091  | -                | -                       | -                         |
| <b>Calpastatin</b>     |                   |         |                  |                         |                           |
| Intact                 | 0.9491            | 0.7331  | 0.2778           | t = 1.497<br>df = 10    | 0.1654                    |
| Crush                  | 0.9361            | 0.6282  | -                | -                       | -                         |
| <b>NF-M</b>            |                   |         |                  |                         |                           |
| Intact                 | 0.9828            | 0.9645  | 0.0898           | t = 7.082<br>df = 10    | <0.0001                   |
| Crush                  | 0.9015            | 0.3829  | -                | -                       | -                         |
| <b>DRP2</b>            |                   |         |                  | Welch's t-test          | Welch's t-test<br>P-value |
| Intact                 | 0.9507            | 0.7461  | 0.0119           | t = 31.57<br>df = 5.719 | <0.0001                   |
| Crush                  | 0.9375            | 0.6392  | -                | -                       | -                         |

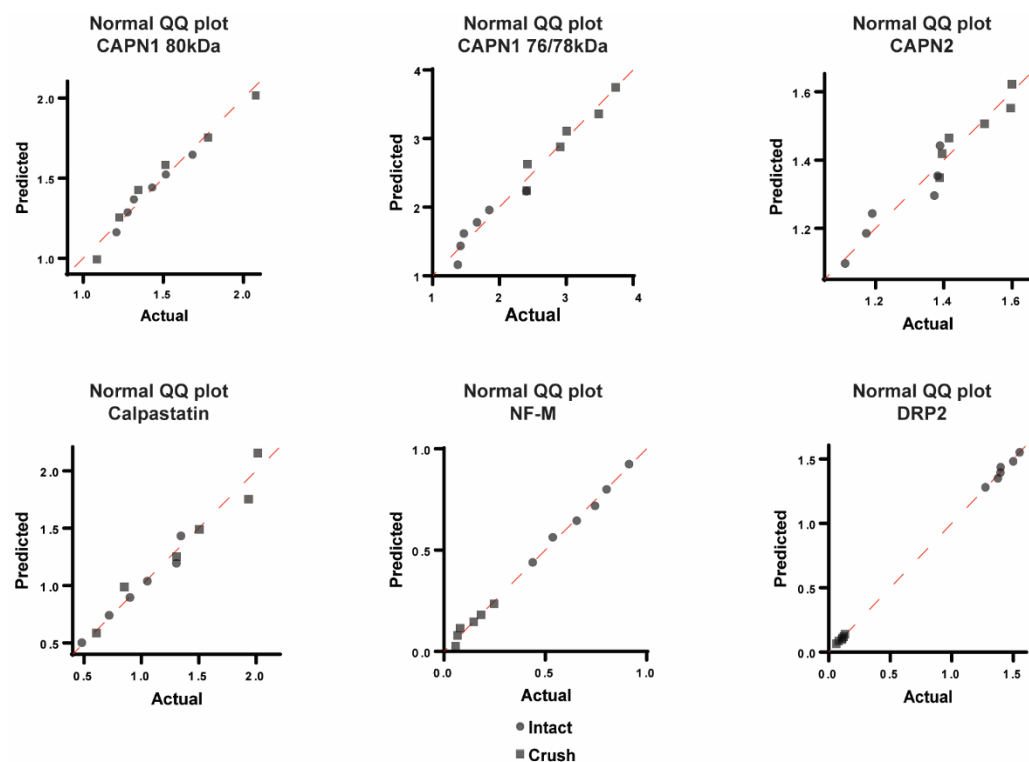

Supplementary S5. Statistical information for Figure 6.
